# Supplementary material for: Nanoporous hybrid electrolytes
Source: Royal Society of Chemistry journal article supplement (doi:10.1039/c0jm04171h), 2011-01-01

ESI for JMC c0jm04171h

## Nanoporous hybrid electrolytes

Jennifer L. Schaefer,<sup>a</sup> Surya S. Moganty,<sup>a</sup> Dennis A. Yanga,<sup>a</sup> and Lynden A. Archer<sup>\*a</sup>

### Synthesis

An alkaline stabilized dispersion of silica nanoparticles, Ludox SM-30 (Aldrich) was diluted to 4 wt% particle fraction by addition of aqueous potassium hydroxide solution, pH ~ 10. [Methoxy(polyethyleneoxy)propyl] trimethoxysilane, 90% (Gelest) at a ratio of 0.6 g silane-PEG per 1.0 g silica was added dropwise, while stirring, in three aliquots each separated by heating at 100°C in an oil bath for 1 hour followed by 10-15 minutes of sonication. Following the addition of the final aliquot of silane-PEG, the reaction solution was heated for 6 hours in an oil bath at 100°C. The reaction solution was then poured into wide petri dishes and heated overnight in a convection oven at 70°C to drive off remaining water and complete the silane reaction. The following day, the NOHMs were purified by washing with ethanol 3 times to remove any free silane-PEG, and resuspended in chloroform.

### Thermal gravimetric analysis:

TGA plots are shown for pure and plasticized hybrid electrolytes. As shown in the figure, the pure NOHMs electrolyte is thermally stable to above 350°C. The plasticized electrolytes have reduced thermal stability due to the decomposition of PEGDME 250.

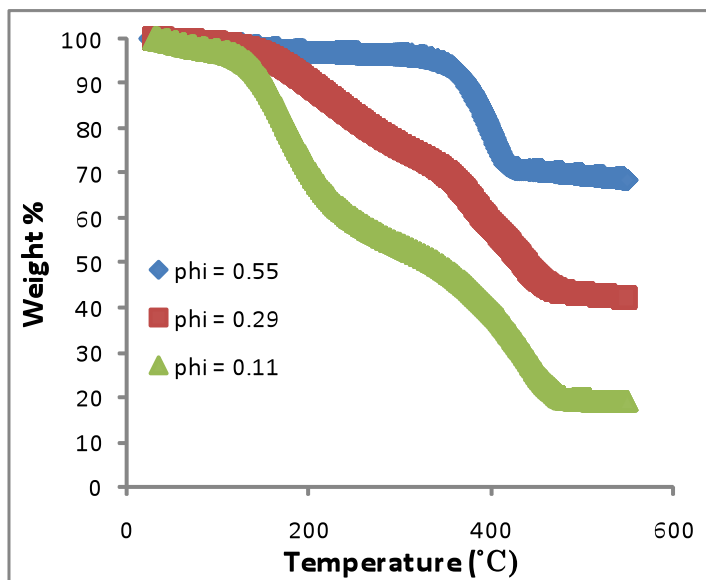

### Power law frequency dependence of the moduli:

Example data analysis for a hybrid electrolyte with  $\phi = 0.24$ . For  $G'$ ,  $G'' \sim \omega^m$ ,  $m$  is the slope in the applicable fit equation.

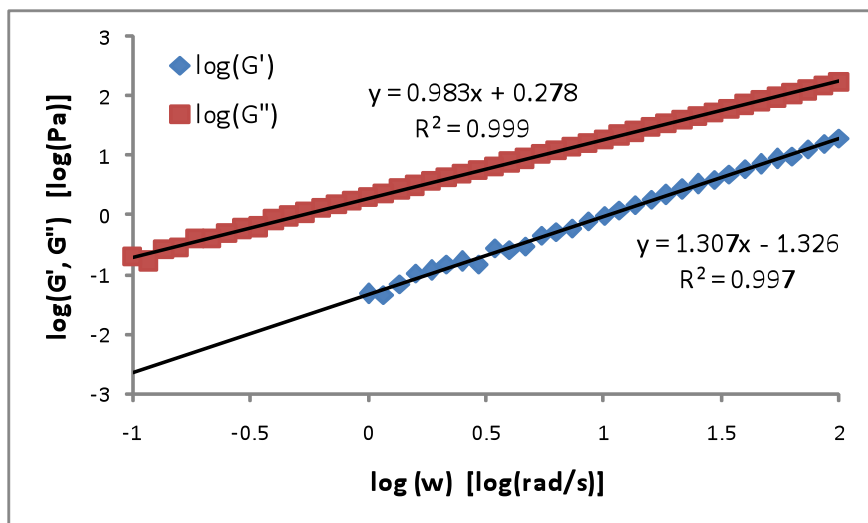

#### Tan( $\delta$ ) VFT fit:

Data of  $\tan(\delta)$  vs. frequency at temperatures -5 to 100 °C in 15 °C increments for pure hybrid electrolyte ( $\phi = 0.55$ ) as obtained from dielectric spectroscopy. Values of the frequency maximum were recorded for fit to the VFT equation.

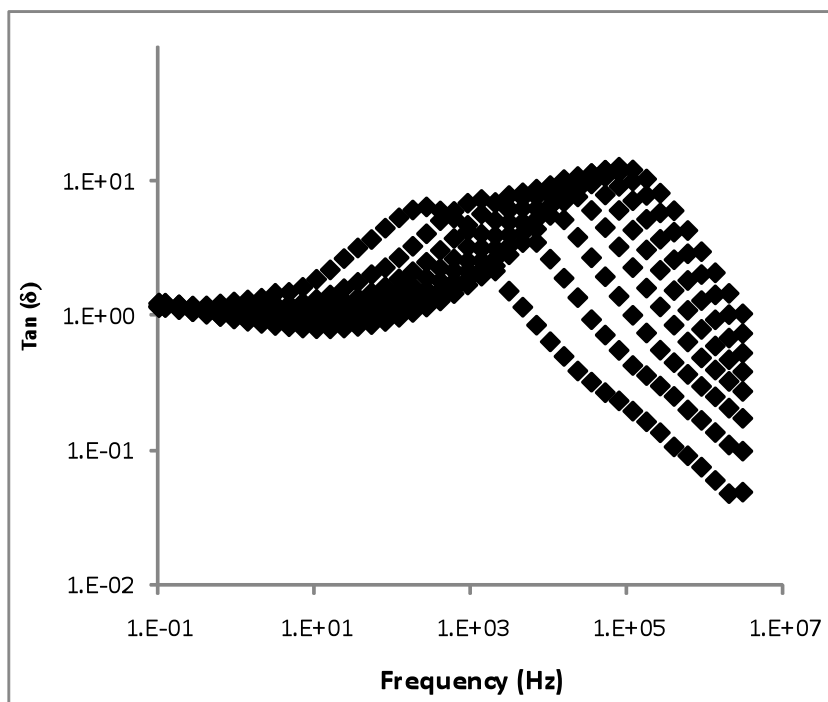

Data points for the frequency maximum of  $\text{Tan}(\delta)$  as obtained from above, fit to VFT equation is line in red. For frequency VFT fit:  $B = -890 \pm 360$ . Similarly,  $B = -900 \pm 80$  for ionic conductivity fit. This suggests that the mechanism for ionic conduction is through segmental motion.<sup>ii</sup>

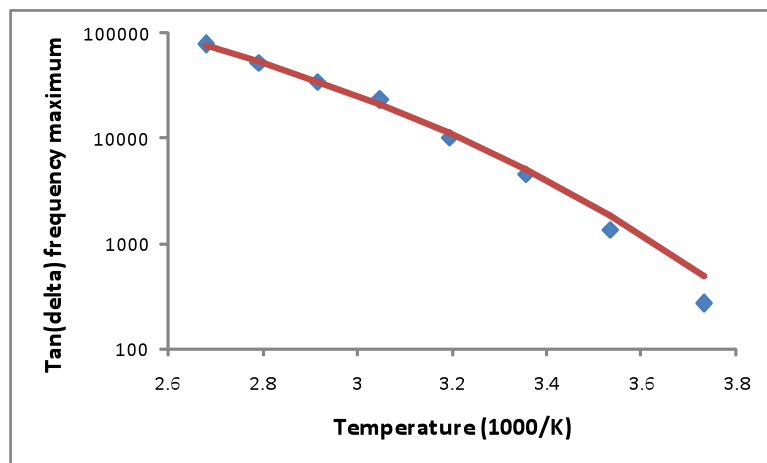

#### Determination the lithium transference number:

Lithium transference measurements performed on a Li/ electrolyte,  $\phi = 0.30$  / Li cell using the method proposed by Bruce<sup>iii</sup> and Scrosati<sup>iv</sup> where initial and steady state values of current are found for a symmetric lithium cell undergoing polarization, with corrections from impedance measurements of the interfacial resistance both before and after polarization.

- A) Current decay while undergoing a 50 mV polarization. Calculations were performed with the actual  $I_0$  and  $I_0$  determined by fit to an exponential decay function.;  $I_{ss}$  was determined by fit to an exponential decay function.

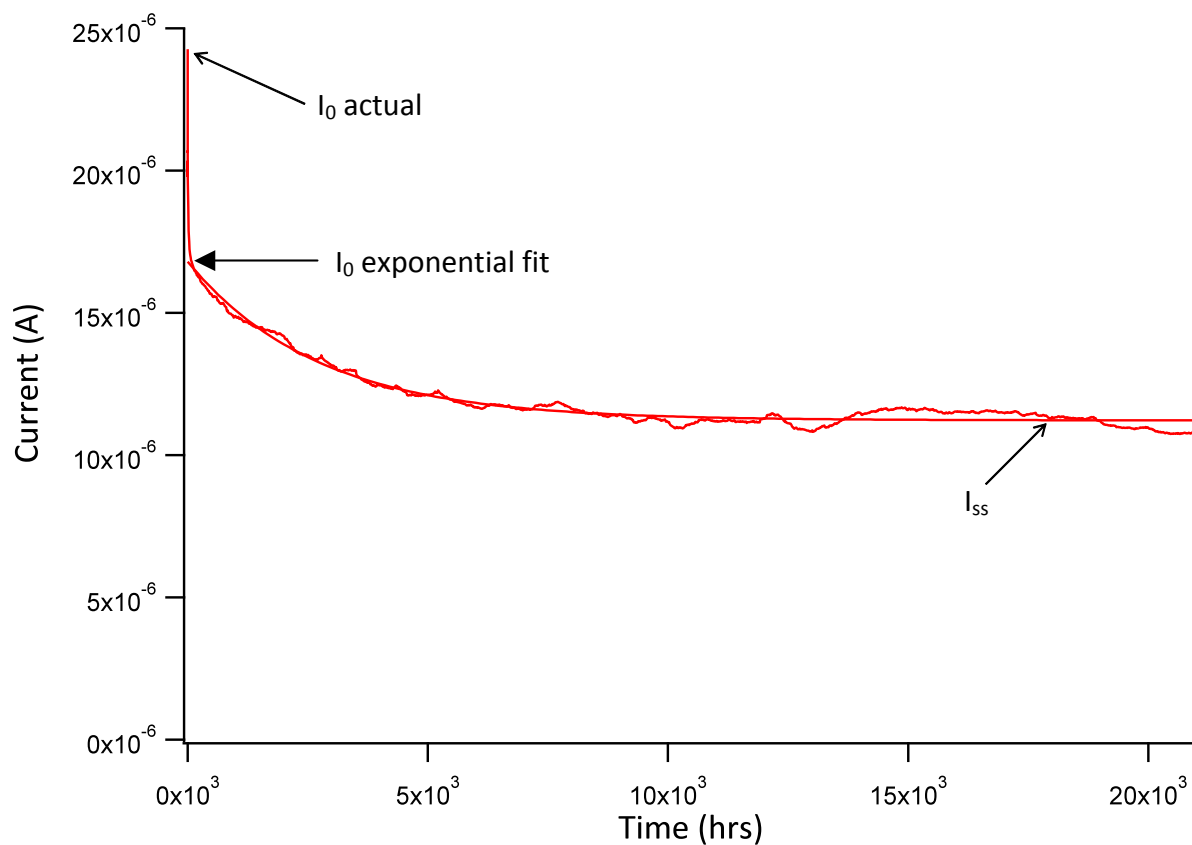

(B). Impedance measurements from  $10^4$  to  $10^{-1}$  Hz, before and after polarization, to determine interfacial charge transfer resistances,  $R_o$  and  $R_{ss}$ .

- i. Idris, N. H.; Senin, H. B.; Arof, A. K. *Ionics* **2007**, 13, 213-217.
- ii. P.G. Bruce, J. Evans, C.A. Vincent, *Solid State Ion.* **1988**, 28-30, 918.
- iii. G.B. Appetecchi, G. Dautzenberg, B. Scrosati, *J. Electrochem. Soc.* **1996**, 143, 6.

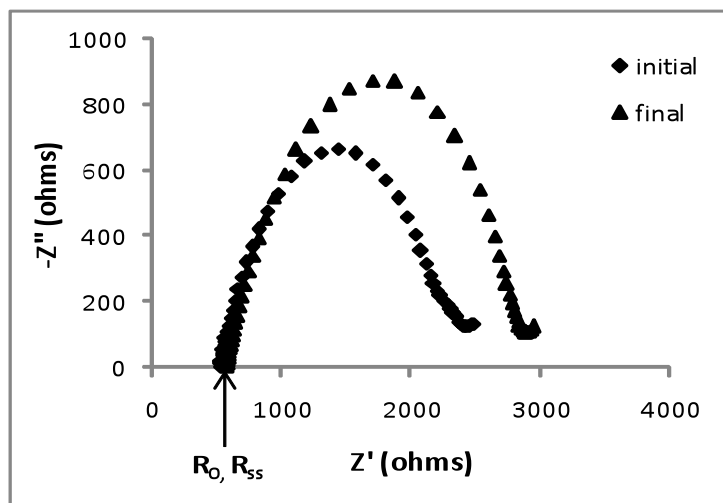

Supplement: c0jm04171h.pdf [file c0jm04171h.pdf]
